# Supplementary material
Source: publisher figshare collection journal article supplement (https://rs.figshare.com/ndownloader/files/31068833)
Supplement: Supplementary file 1 [file 31068833]

Long-term trends in the occupancy of ants revealed through use of multi-sourced datasets

Biology Letters

Julie K. Sheard*1, Carsten Rahbek1,2,3,4,5, Robert R. Dunn6, Nathan J. Sanders7, Nick J.B. Isaac8

1Center for Macroecology, Evolution and Climate, and 2Center for Global Mountain Biodiversity, GLOBE Institute, University of Copenhagen, Universitetsparken 15, Copenhagen 2100, Denmark

3Institute of Ecology, Peking University, Beijing 100871, People’s Republic of China

4Department of Life Sciences, Imperial College London, Ascot SL5 7PY, UK

5Danish Institute for Advanced Study, University of Southern Denmark, Campusvej 55, Odense M 5230, Denmark

6Department of Applied Ecology, North Carolina State University, Raleigh, NC, USA

7Department of Ecology and Evolutionary Biology, University of Michigan, Ann Arbor, MI, USA

8UK Centre for Ecology and Hydrology, Crowmarsh Gifford, Maclean Building, Wallingford OX10 8BB, UK

**Table S1: Species list**

Overview of all native species found in Denmark, including first and last detection year, number of detections in each dataset and the total number of detections.

| species | decades |  | years | | |  | detections | | | | | | | |
| --- | --- | --- | --- | --- | --- | --- | --- | --- | --- | --- | --- | --- | --- | --- |
|  | first | last | total (n) |  | Ant Hunt | EuroAnts | Holgersen | NHM Aarhus | NHM Denmark | Schär | Skøtt | total |
| *Camponotus herculeanus* | 9 |  | 1913 | 2015 | 30 |  |  | 2 |  | 2 | 36 | 1 | 4 | 45 |
| *Camponotus ligniperda* | 6 |  | 1929 | 2015 | 9 |  |  |  |  | 1 | 7 | 1 | 1 | 10 |
| *Formica cinerea* | 9 |  | 1909 | 2018 | 30 |  | 6 |  | 2 |  | 55 |  | 9 | 72 |
| *Formica clara* | 1 |  | 2012 | 2018 | 2 |  | 4 | 1 |  |  |  |  |  | 5 |
| *Formica cunicularia* | 5 |  | 1942 | 1994 | 16 |  |  |  |  |  | 22 |  |  | 22 |
| *Formica exsecta* | 8 |  | 1908 | 2017 | 36 |  | 1 |  | 1 | 3 | 43 | 2 | 33 | 83 |
| *Formica foreli* | 1 |  | 2012 | 2019 | 3 |  |  | 3 |  |  |  | 1 |  | 4 |
| *Formica forsslundi* | 2 |  | 1974 | 1989 | 2 |  |  |  |  |  | 2 |  |  | 2 |
| *Formica fusca* | 12 |  | 1901 | 2019 | 77 |  | 85 | 5 | 1 | 37 | 196 | 3 | 84 | 411 |
| *Formica gagatoides* | 2 |  | 1964 | 1972 | 3 |  |  |  |  | 2 | 2 |  |  | 4 |
| *Formica lugubris* | 2 |  | 1941 | 2018 | 2 |  | 1 |  |  |  | 1 |  |  | 2 |
| *Formica picea* | 8 |  | 1935 | 2019 | 32 |  | 1 | 2 | 1 |  | 28 | 2 | 43 | 77 |
| *Formica polyctena* | 10 |  | 1914 | 2019 | 52 |  | 34 | 6 |  |  | 109 | 3 |  | 152 |
| *Formica pratensis* | 10 |  | 1908 | 2017 | 36 |  | 1 |  |  | 3 | 47 |  | 16 | 67 |
| *Formica pressilabris* | 7 |  | 1939 | 2017 | 32 |  | 1 | 2 | 1 | 1 | 40 |  | 13 | 58 |
| *Formica rufa* | 11 |  | 1908 | 2018 | 68 |  | 7 | 3 |  | 50 | 154 | 3 | 87 | 304 |
| *Formica rufibarbis* | 10 |  | 1909 | 2019 | 55 |  | 4 | 5 |  | 2 | 128 | 4 | 12 | 155 |
| *Formica sanguinea* | 8 |  | 1935 | 2018 | 48 |  | 2 | 2 |  | 3 | 101 | 1 | 41 | 150 |
| *Formica truncorum* | 8 |  | 1918 | 2017 | 27 |  | 2 |  |  | 2 | 37 | 1 | 4 | 46 |
| *Formica uralensis* | 7 |  | 1938 | 2019 | 20 |  |  | 3 | 1 | 1 | 48 | 1 | 29 | 83 |
| *Formicoxenus nitidulus* | 7 |  | 1912 | 2012 | 19 |  |  |  |  | 1 | 21 | 1 | 3 | 26 |
| *Harpagoxenus sublaevis* | 2 |  | 1964 | 1974 | 6 |  |  |  |  |  | 9 |  | 7 | 16 |
| *Hypoponera punctatissima* | 6 |  | 1944 | 2017 | 9 |  | 1 |  |  |  | 18 |  | 9 | 28 |
| *Lasius brunneus* | 6 |  | 1907 | 2019 | 8 |  |  | 1 |  | 1 | 8 |  |  | 10 |
| *Lasius flavus* | 9 |  | 1903 | 2019 | 48 |  | 22 | 6 | 1 | 16 | 71 | 4 | 52 | 172 |
| *Lasius fuliginosus* | 11 |  | 1908 | 2019 | 54 |  | 11 | 5 | 2 | 14 | 79 | 1 | 21 | 133 |
| *Lasius meridionalis* | 8 |  | 1935 | 2015 | 25 |  |  |  |  |  | 36 | 6 |  | 42 |
| *Lasius mixtus* | 7 |  | 1913 | 1971 | 10 |  |  |  |  |  | 12 |  | 2 | 14 |
| *Lasius niger* | 11 |  | 1903 | 2019 | 77 |  | 323 | 5 | 3 | 37 | 196 | 6 | 90 | 660 |
| *Lasius platythorax* | 1 |  | 2012 | 2018 | 5 |  | 41 | 7 |  |  |  | 4 |  | 52 |
| *Lasius psammophilus* | 1 |  | 2012 | 2019 | 6 |  | 2 | 4 |  |  |  | 4 |  | 10 |
| *Lasius umbratus* | 11 |  | 1900 | 2019 | 51 |  | 1 | 4 |  | 13 | 60 | 4 | 8 | 90 |
| *Leptothorax acervorum* | 10 |  | 1924 | 2019 | 42 |  |  | 5 |  | 6 | 84 | 6 | 88 | 189 |
| *Leptothorax muscorum* | 2 |  | 1971 | 1993 | 4 |  |  |  |  |  | 2 |  | 2 | 4 |
| *Myrmecina graminicola* | 1 |  | 1970 | 1970 | 1 |  |  |  |  | 1 |  |  |  | 1 |
| *Myrmica lobicornis* | 7 |  | 1933 | 2017 | 32 |  | 2 |  |  | 1 | 35 | 1 | 14 | 53 |
| *Myrmica rubra* | 11 |  | 1902 | 2019 | 70 |  | 37 | 4 | 1 | 49 | 158 | 7 | 46 | 302 |
| *Myrmica ruginodis* | 10 |  | 1904 | 2019 | 66 |  | 35 | 7 | 1 | 106 | 126 | 4 | 81 | 360 |
| *Myrmica rugulosa* | 10 |  | 1913 | 2018 | 48 |  | 6 |  |  | 18 | 62 | 4 | 18 | 108 |
| *Myrmica sabuleti* | 10 |  | 1911 | 2019 | 47 |  | 4 | 4 |  | 2 | 93 | 4 | 15 | 122 |
| *Myrmica scabrinodis* | 11 |  | 1901 | 2017 | 63 |  | 4 | 5 | 1 | 26 | 108 | 6 | 39 | 189 |
| *Myrmica schencki* | 7 |  | 1936 | 2018 | 28 |  | 3 |  |  | 1 | 39 |  | 6 | 49 |
| *Myrmica specioides* | 3 |  | 1941 | 2012 | 3 |  |  | 1 |  |  | 2 | 1 |  | 4 |
| *Myrmica sulcinodis* | 5 |  | 1936 | 1973 | 10 |  |  |  |  | 1 | 12 |  | 12 | 25 |
| *Stenamma debile* or *S. westwoodii* | 2 |  | 1958 | 1995 | 2 |  |  |  |  | 1 | 1 |  |  | 2 |
| *Temnothorax interruptus* | 3 |  | 1969 | 1980 | 3 |  |  |  |  |  | 5 |  |  | 5 |
| *Temnothorax nylanderi* | 2 |  | 1988 | 2012 | 2 |  |  | 1 |  |  | 1 |  |  | 2 |
| *Temnothorax parvulus* | 1 |  | 2012 | 2012 | 1 |  |  | 1 |  |  |  |  |  | 1 |
| *Temnothorax tuberum* | 3 |  | 1942 | 1985 | 4 |  |  |  |  |  | 5 |  |  | 5 |
| *Tetramorium atratulum* | 1 |  | 1942 | 1942 | 1 |  |  |  |  |  | 1 |  |  | 1 |
| *Tetramorium caespitum* | 11 |  | 1903 | 2019 | 50 |  | 25 | 4 | 2 | 7 | 79 | 2 | 51 | 170 |
